# Supplementary material for: SARS-CoV-2 Neutralizing Antibody Levels Post COVID-19 Vaccination Based on ELISA Method—A Small Real-World Sample Exploration
Source: Vaccines (Basel). 2021 Oct 6;9(10):1139. doi: 10.3390/vaccines9101139 (PMC8541171; doi:10.3390/vaccines9101139)
Supplement: Supplementary file 1 [file vaccines-09-01139-s001.zip › vaccines-1365883-supplementary.pdf]

**Table S1 The demographic characteristics between CoronaVac and Inactivated SARS-CoV-2 vaccine group**

| Item                     |                 | CoronaVac   | Mean±SD<br>/ % | Inactivated<br>SARS-CoV-2<br>vaccine | Mean±SD<br>/ % | $t / \chi^2$ | $P$<br>value |
|--------------------------|-----------------|-------------|----------------|--------------------------------------|----------------|--------------|--------------|
|                          |                 | N=61        |                | N=64                                 |                |              |              |
| Sex                      | Male            | 19          | 31.15%         | 16                                   | 25.00%         | 0.585        | 0.444        |
|                          | Female          | 42          | 68.85%         | 48                                   | 75.00%         |              |              |
| Age (years)              |                 | 36.43±11.20 |                | 36.59±9.99                           |                | -0.088       | 0.930        |
|                          | 20–29           | 20          | 32.79%         | 19                                   | 29.69%         | 2.012        | 0.570        |
|                          | 30–39           | 17          | 27.87%         | 25                                   | 39.06%         |              |              |
|                          | 40–49           | 17          | 27.87%         | 13                                   | 20.31%         |              |              |
|                          | ≥50             | 7           | 11.48%         | 7                                    | 10.94%         |              |              |
| Height (cm)              |                 | 166.19±7.45 |                | 165.01±6.85                          |                | 0.896        | 0.372        |
| Weight (kg)              |                 | 63.16±11.30 |                | 62.76±10.36                          |                | 0.201        | 0.841        |
| BMI (kg/m <sup>2</sup> ) |                 | 22.76±2.89  |                | 23.01±3.30                           |                | -0.452       | 0.652        |
|                          | ≥24             | 18          | 29.51%         | 25                                   | 39.06%         | 1.263        | 0.261        |
|                          | 18.5 < BMI < 24 | 42          | 68.85%         | 34                                   | 53.13%         |              |              |
|                          | ≤18.5           | 1           | 1.64%          | 5                                    | 7.81%          |              |              |

127 participants who had completed COVID-19 vaccination (inactivated SARS-CoV-2 vaccine, 64; CoronaVac, 61; CanSino, 2)

**Table S2 Time of vaccination completed (weeks) between CoronaVac and Inactivated SARS-CoV-2 vaccine group**

|                                       | CoronaVac |               | inactivated SARS-CoV-2 vaccine |                | CanSino |                |
|---------------------------------------|-----------|---------------|--------------------------------|----------------|---------|----------------|
|                                       | N=61      | positive n(%) | N=64                           | positive n (%) | N=2     | positive n (%) |
| Time of vaccination completed (weeks) |           | 12.30±10.34*  |                                | 16.72±5.26*    |         |                |
| 2-4                                   | 11        | 11(91.67%)    | 1                              | 1(100.00%)     |         |                |
| 5-8                                   | 20        | 14(70.00%)    | 9                              | 4(44.44%)      | 1       | 0              |
| 9-12                                  | 8         | 4(50.00%)     | 4                              | 3(75.00%)      |         |                |
| 13-16                                 | 7         | 3(42.86%)     | 2                              | 2(100.00%)     |         |                |
| 17-20                                 | 9         | 7(77.78%)     | 42                             | 15(35.71%)     |         |                |
| 21-24                                 | 1         | 0(0.00%)      | 6                              | 2(33.33%)      |         |                |
| >24                                   | 5         | 0(0.00%)      |                                |                | 1       | 0              |

127 participants who had completed COVID-19 vaccination (inactivated SARS-CoV-2 vaccine, 64; CoronaVac, 61; CanSino, 2)

\* significant difference in vaccination times, with average vaccination weeks in

CoronaVac and inactivated SARS-CoV-2 vaccine groups of 12.30±10.34 and 16.72±

5.26, respectively ( $t = -2.996$ ,  $P = 0.004$ ).
